# Supplementary material
Source: publisher figshare collection journal article supplement (https://sage.figshare.com/ndownloader/files/26806990)
Supplement: Supplementary file 1 [file 26806990]

* Replication code - Explaining Elite Perceptions of Legitimacy in Global Governance
* Authors: Soetkin Verhaegen, Jan Aart Scholte, Jonas Tallberg 
* For further information contact S.Verhaegen@maastrichtuniversity.nl

* Please note that this do-file and the related dataset are only for purposes of replication of the analyses presented in the article. For inquiries about the use of the LegGov Elite Survey data for other purposes, please contact Jonas.Tallberg@statsvet.su.se or S.Verhaegen@maastrichtuniversity.nl.


*********************************************
* Replication tables and figures in article *
*********************************************

* Table 1
sum confIMF confUNFCCC confUNSC

* Figure 1
hist confIMF, percent
hist confUNFCCC, percent 
hist confUNSC, percent

* Figure 2
sort country
by country: sum confUNFCCC
by country: sum confUNSC
by country: sum confIMF

* Figure 3
sort elitecat3
by elitecat3: summarize confUNFCCC
by elitecat3: summarize confUNSC
by elitecat3: summarize confIMF

* Table 2
regress confIMF  demIMF effIMF fairIMF  age male, vce(bootstrap, cluster (countrysample)) 
regress confIMF  demIMF effIMF fairIMF inflIMF benefitIMF tradeglob developglob feelworld confNATIONAL econsatcountry polsatisfaction age male, vce(bootstrap, cluster (countrysample))

test demIMF==effIMF
test demIMF==fairIMF
test effIMF==fairIMF
test benefitIMF==fairIMF

regress confUNFCCC  demUNFCCC effUNFCCC fairUNFCCC age male, vce(bootstrap, cluster (countrysample))
regress confUNFCCC  demUNFCCC effUNFCCC fairUNFCCC inflUNFCCC benefitUNFCCC envglob feelworld confNATIONAL econsatcountry polsatisfaction age male, vce(bootstrap, cluster (countrysample))

test demUNFCCC==effUNFCCC
test demUNFCCC==fairUNFCCC
test effUNFCCC==fairUNFCCC
test benefitUNFCCC==fairUNFCCC

regress confUNSC  demUNSC effUNSC fairUNSC  age male , vce(bootstrap, cluster (countrysample))
regress confUNSC  demUNSC effUNSC fairUNSC inflUNSC benefitUNSC defenseglob feelworld confNATIONAL econsatcountry polsatisfaction age male, vce(bootstrap, cluster (countrysample))

test demUNSC==effUNSC
test demUNSC==fairUNSC
test effUNSC==fairUNSC
test benefitUNSC==fairUNSC

* Figure 3

* IMF
regress confIMF  demIMF effIMF fairIMF inflIMF benefitIMF tradeglob developglob feelworld confNATIONAL econsatcountry polsatisfaction age male, vce(bootstrap, cluster (countrysample))

margins, at(demIMF=(0(1)9))
marginsplot, graphregion(fcolor(white)) xtitle("Satisfaction democracy IMF") ytitle("Predicted confidence IMF")

margins, at(effIMF=(0(1)9))
marginsplot, graphregion(fcolor(white)) xtitle("Satisfaction effectiveness IMF") ytitle("Predicted confidence IMF")

margins, at(fairIMF=(0(1)9))
marginsplot, graphregion(fcolor(white)) xtitle("Satisfaction fairness IMF") ytitle("Predicted confidence IMF")

margins, at(benefitIMF=(0(1)3))
marginsplot, graphregion(fcolor(white)) xtitle("Country benefit IMF") ytitle("Predicted confidence IMF")

margins, at(confNATIONAL=(0(1)3))
marginsplot, graphregion(fcolor(white)) xtitle("Confidence national government and parliament") ytitle("Predicted confidence IMF")


* UNFCCC
regress confUNFCCC  demUNFCCC effUNFCCC fairUNFCCC inflUNFCCC benefitUNFCCC envglob feelworld confNATIONAL econsatcountry polsatisfaction age male, vce(bootstrap, cluster (countrysample))

margins, at(demUNFCCC=(0(1)9))
marginsplot, graphregion(fcolor(white)) xtitle("Satisfaction democracy UNFCCC") ytitle("Predicted confidence UNFCCC")

margins, at(effUNFCCC=(0(1)9))
marginsplot, graphregion(fcolor(white)) xtitle("Satisfaction effectiveness UNFCCC") ytitle("Predicted confidence UNFCCC")

margins, at(fairUNFCCC=(0(1)9))
marginsplot, graphregion(fcolor(white)) xtitle("Satisfaction fairness UNFCCC") ytitle("Predicted confidence UNFCCC")

margins, at(benefitUNFCCC=(0(1)3))
marginsplot, graphregion(fcolor(white)) xtitle("Country benefit UNFCCC") ytitle("Predicted confidence UNFCCC")

margins, at(confNATIONAL=(0(1)3))
marginsplot, graphregion(fcolor(white)) xtitle("Confidence national government and parliament") ytitle("Predicted confidence UNFCCC")


* UNSC
regress confUNSC  demUNSC effUNSC fairUNSC inflUNSC benefitUNSC defenseglob feelworld confNATIONAL econsatcountry polsatisfaction age male, vce(bootstrap, cluster (countrysample))

margins, at(demUNSC=(0(1)9))
marginsplot, graphregion(fcolor(white)) xtitle("Satisfaction democracy UNSC") ytitle("Predicted confidence UNSC")

margins, at(effUNSC=(0(1)9))
marginsplot, graphregion(fcolor(white)) xtitle("Satisfaction effectiveness UNSC") ytitle("Predicted confidence UNSC")

margins, at(fairUNSC=(0(1)9))
marginsplot, graphregion(fcolor(white)) xtitle("Satisfaction fairness UNSC") ytitle("Predicted confidence UNSC")

margins, at(benefitUNSC=(0(1)3))
marginsplot, graphregion(fcolor(white)) xtitle("Country benefit UNSC") ytitle("Predicted confidence UNSC")

margins, at(confNATIONAL=(0(1)3))
marginsplot, graphregion(fcolor(white)) xtitle("Confidence national government and parliament") ytitle("Predicted confidence UNSC")


**********************************
* Replication tables in Appendix *
**********************************

* Appendix A
sort country
by country: sum confIMF confUNFCCC confUNSC

* Appendix B
sort elitecat3
by elitecat3: sum confIMF confUNFCCC confUNSC

* Appendix C
sum demIMF demUNFCCC demUNSC effIMF effUNFCCC effUNSC fairIMF fairUNFCCC fairUNSC inflIMF inflUNFCCC inflUNSC benefitIMF benefitUNFCCC benefitUNSC feelworld econsatcountry polsatisfaction confNATIONAL
sum tradeglob developglob envglob defenseglob

* Appendix D

* Table D1
* Knowledge IOs
regress confIMF  demIMF effIMF fairIMF inflIMF benefitIMF tradeglob developglob i.know_all##c.feelworld confNATIONAL econsatcountry polsatisfaction age male, vce(bootstrap, cluster (countrysample))

regress confUNFCCC  demUNFCCC effUNFCCC fairUNFCCC inflUNFCCC benefitUNFCCC envglob i.know_all##c.feelworld confNATIONAL econsatcountry polsatisfaction age male, vce(bootstrap, cluster (countrysample))

regress confUNSC  demUNSC effUNSC fairUNSC inflUNSC benefitUNSC defenseglob i.know_all##c.feelworld confNATIONAL econsatcountry polsatisfaction age male, vce(bootstrap, cluster (countrysample))

regress confIMF  demIMF effIMF fairIMF inflIMF benefitIMF i.know_all##i.tradeglob developglob feelworld confNATIONAL econsatcountry polsatisfaction age male, vce(bootstrap, cluster (countrysample))

regress confIMF  demIMF effIMF fairIMF inflIMF benefitIMF tradeglob i.know_all##i.developglob feelworld confNATIONAL econsatcountry polsatisfaction age male, vce(bootstrap, cluster (countrysample))

regress confUNFCCC  demUNFCCC effUNFCCC fairUNFCCC inflUNFCCC benefitUNFCCC i.know_all##i.envglob feelworld confNATIONAL econsatcountry polsatisfaction age male, vce(bootstrap, cluster (countrysample))

regress confUNSC  demUNSC effUNSC fairUNSC inflUNSC benefitUNSC i.know_all##i.defenseglob feelworld confNATIONAL econsatcountry polsatisfaction age male, vce(bootstrap, cluster (countrysample))

* Interest in global politics
regress confIMF  demIMF effIMF fairIMF inflIMF benefitIMF tradeglob developglob i.globalpolint_01##c.feelworld confNATIONAL econsatcountry polsatisfaction age male, vce(bootstrap, cluster (countrysample))

regress confUNFCCC  demUNFCCC effUNFCCC fairUNFCCC inflUNFCCC benefitUNFCCC envglob i.globalpolint_01##c.feelworld confNATIONAL econsatcountry polsatisfaction age male, vce(bootstrap, cluster (countrysample))

regress confUNSC  demUNSC effUNSC fairUNSC inflUNSC benefitUNSC defenseglob i.globalpolint_01##c.feelworld confNATIONAL econsatcountry polsatisfaction age male, vce(bootstrap, cluster (countrysample))

regress confIMF  demIMF effIMF fairIMF inflIMF benefitIMF i.globalpolint_01##i.tradeglob developglob feelworld confNATIONAL econsatcountry polsatisfaction age male, vce(bootstrap, cluster (countrysample))

regress confIMF  demIMF effIMF fairIMF inflIMF benefitIMF tradeglob i.globalpolint_01##i.developglob feelworld confNATIONAL econsatcountry polsatisfaction age male, vce(bootstrap, cluster (countrysample))

regress confUNFCCC  demUNFCCC effUNFCCC fairUNFCCC inflUNFCCC benefitUNFCCC i.globalpolint_01##i.envglob feelworld confNATIONAL econsatcountry polsatisfaction age male, vce(bootstrap, cluster (countrysample))

regress confUNSC  demUNSC effUNSC fairUNSC inflUNSC benefitUNSC i.globalpolint_01##i.defenseglob feelworld confNATIONAL econsatcountry polsatisfaction age male, vce(bootstrap, cluster (countrysample))

* Work orientation (global)
regress confIMF  demIMF effIMF fairIMF inflIMF benefitIMF tradeglob developglob i.globalorient##c.feelworld confNATIONAL econsatcountry polsatisfaction age male, vce(bootstrap, cluster (countrysample))

regress confUNFCCC  demUNFCCC effUNFCCC fairUNFCCC inflUNFCCC benefitUNFCCC envglob i.globalorient##c.feelworld confNATIONAL econsatcountry polsatisfaction age male, vce(bootstrap, cluster (countrysample))

regress confUNSC  demUNSC effUNSC fairUNSC inflUNSC benefitUNSC defenseglob i.globalorient##c.feelworld confNATIONAL econsatcountry polsatisfaction age male, vce(bootstrap, cluster (countrysample))

regress confIMF  demIMF effIMF fairIMF inflIMF benefitIMF i.globalorient##i.tradeglob developglob feelworld confNATIONAL econsatcountry polsatisfaction age male, vce(bootstrap, cluster (countrysample))

regress confIMF  demIMF effIMF fairIMF inflIMF benefitIMF tradeglob i.globalorient##i.developglob feelworld confNATIONAL econsatcountry polsatisfaction age male, vce(bootstrap, cluster (countrysample))

regress confUNFCCC  demUNFCCC effUNFCCC fairUNFCCC inflUNFCCC benefitUNFCCC i.globalorient##i.envglob feelworld confNATIONAL econsatcountry polsatisfaction age male, vce(bootstrap, cluster (countrysample))

regress confUNSC  demUNSC effUNSC fairUNSC inflUNSC benefitUNSC i.globalorient##i.defenseglob feelworld confNATIONAL econsatcountry polsatisfaction age male, vce(bootstrap, cluster (countrysample))


* Table D2
regress confIMF  demIMF effIMF fairIMF inflIMF benefitIMF tradeglob developglob feelworld confNATIONAL econsatcountry polsatisfaction age male MAPhD finsathousehold, vce(bootstrap, cluster (countrysample))

regress confUNFCCC  demUNFCCC effUNFCCC fairUNFCCC inflUNFCCC benefitUNFCCC envglob feelworld confNATIONAL econsatcountry polsatisfaction age male MAPhD finsathousehold, vce(bootstrap, cluster (countrysample))

regress confUNSC  demUNSC effUNSC fairUNSC inflUNSC benefitUNSC defenseglob feelworld confNATIONAL econsatcountry polsatisfaction age male MAPhD finsathousehold, vce(bootstrap, cluster (countrysample))


* Table D3
regress confIMF  demIMF effIMF fairIMF inflIMF benefitIMF tradeglob developglob feelworld confNATIONAL econsatcountry polsatisfaction age male gentrust, vce(bootstrap, cluster (countrysample))

regress confUNFCCC  demUNFCCC effUNFCCC fairUNFCCC inflUNFCCC benefitUNFCCC envglob feelworld confNATIONAL econsatcountry polsatisfaction age male gentrust, vce(bootstrap, cluster (countrysample))

regress confUNSC  demUNSC effUNSC fairUNSC inflUNSC benefitUNSC defenseglob feelworld confNATIONAL econsatcountry polsatisfaction age male gentrust, vce(bootstrap, cluster (countrysample))


* Table D4
regress confIMF  demIMF effIMF fairIMF inflIMF benefitIMF tradeglob developglob feelworld confNATIONAL econsatcountry polsatisfaction age male leftright immigrants, vce(bootstrap, cluster (countrysample))

regress confUNFCCC  demUNFCCC effUNFCCC fairUNFCCC inflUNFCCC benefitUNFCCC envglob feelworld confNATIONAL econsatcountry polsatisfaction age male leftright immigrants, vce(bootstrap, cluster (countrysample))

regress confUNSC  demUNSC effUNSC fairUNSC inflUNSC benefitUNSC defenseglob feelworld confNATIONAL econsatcountry polsatisfaction age male leftright immigrants, vce(bootstrap, cluster (countrysample))


* Table D5
ologit confIMF  demIMF effIMF fairIMF inflIMF benefitIMF tradeglob developglob feelworld confNATIONAL econsatcountry polsatisfaction age male, vce(bootstrap, cluster (countrysample)) or

ologit confUNFCCC  demUNFCCC effUNFCCC fairUNFCCC inflUNFCCC benefitUNFCCC envglob feelworld confNATIONAL econsatcountry polsatisfaction age male, vce(bootstrap, cluster (countrysample)) or

ologit confUNSC  demUNSC effUNSC fairUNSC inflUNSC benefitUNSC defenseglob feelworld confNATIONAL econsatcountry polsatisfaction age male, vce(bootstrap, cluster (countrysample)) or


* Table D6
regress confIMF  c.demIMF##c.importancedemocracy effIMF fairIMF inflIMF benefitIMF tradeglob developglob feelworld confNATIONAL econsatcountry polsatisfaction age male, vce(bootstrap, cluster (countrysample))

regress confUNFCCC  c.demUNFCCC##c.importancedemocracy effUNFCCC fairUNFCCC inflUNFCCC benefitUNFCCC envglob feelworld confNATIONAL econsatcountry polsatisfaction age male, vce(bootstrap, cluster (countrysample))

regress confUNSC  c.demUNSC##c.importancedemocracy effUNSC fairUNSC inflUNSC benefitUNSC defenseglob feelworld confNATIONAL econsatcountry polsatisfaction age male, vce(bootstrap, cluster (countrysample))

regress confIMF  demIMF c.effIMF##c.importanceffectiveness fairIMF inflIMF benefitIMF tradeglob developglob feelworld confNATIONAL econsatcountry polsatisfaction age male, vce(bootstrap, cluster (countrysample))

regress confUNFCCC  demUNFCCC c.effUNFCCC##c.importanceffectiveness fairUNFCCC inflUNFCCC benefitUNFCCC envglob feelworld confNATIONAL econsatcountry polsatisfaction age male, vce(bootstrap, cluster (countrysample))

regress confUNSC  demUNSC c.effUNSC##c.importanceffectiveness fairUNSC inflUNSC benefitUNSC defenseglob feelworld confNATIONAL econsatcountry polsatisfaction age male, vce(bootstrap, cluster (countrysample))

regress confIMF  demIMF effIMF c.fairIMF##c.importancefairness inflIMF benefitIMF tradeglob developglob feelworld confNATIONAL econsatcountry polsatisfaction age male, vce(bootstrap, cluster (countrysample))

regress confUNFCCC  demUNFCCC effUNFCCC c.fairUNFCCC##c.importancefairness  inflUNFCCC benefitUNFCCC envglob feelworld confNATIONAL econsatcountry polsatisfaction age male, vce(bootstrap, cluster (countrysample))

regress confUNSC  demUNSC effUNSC c.fairUNSC##c.importancefairness inflUNSC benefitUNSC defenseglob feelworld confNATIONAL econsatcountry polsatisfaction age male, vce(bootstrap, cluster (countrysample))


* Table D7
regress confIMF demIMF effIMF fairIMF if countrysample==2
regress confIMF demIMF effIMF fairIMF if countrysample==4
regress confIMF demIMF effIMF fairIMF if countrysample==3
regress confIMF demIMF effIMF fairIMF if countrysample==7
regress confIMF demIMF effIMF fairIMF if countrysample==5
regress confIMF demIMF effIMF fairIMF if countrysample==6
regress confIMF demIMF effIMF fairIMF if countrysample==1

regress confUNFCCC  demUNFCCC effUNFCCC fairUNFCCC if countrysample==2
regress confUNFCCC  demUNFCCC effUNFCCC fairUNFCCC if countrysample==4
regress confUNFCCC  demUNFCCC effUNFCCC fairUNFCCC if countrysample==3
regress confUNFCCC  demUNFCCC effUNFCCC fairUNFCCC if countrysample==7
regress confUNFCCC  demUNFCCC effUNFCCC fairUNFCCC if countrysample==5
regress confUNFCCC  demUNFCCC effUNFCCC fairUNFCCC if countrysample==6
regress confUNFCCC  demUNFCCC effUNFCCC fairUNFCCC if countrysample==1

regress confUNSC  demUNSC effUNSC fairUNSC if countrysample==2
regress confUNSC  demUNSC effUNSC fairUNSC if countrysample==4
regress confUNSC  demUNSC effUNSC fairUNSC if countrysample==3
regress confUNSC  demUNSC effUNSC fairUNSC if countrysample==7
regress confUNSC  demUNSC effUNSC fairUNSC if countrysample==5
regress confUNSC  demUNSC effUNSC fairUNSC if countrysample==6
regress confUNSC  demUNSC effUNSC fairUNSC if countrysample==1

* Table D8
regress confIMF  demIMF effIMF fairIMF inflIMF benefitIMF tradeglob developglob feelworld confNATIONAL econsatcountry polsatisfaction age male  if political==1 , vce(bootstrap, cluster (countrysample))

regress confUNFCCC  demUNFCCC effUNFCCC fairUNFCCC inflUNFCCC benefitUNFCCC envglob feelworld confNATIONAL econsatcountry polsatisfaction age male if political==1, vce(bootstrap, cluster (countrysample))

regress confUNSC  demUNSC effUNSC fairUNSC inflUNSC benefitUNSC defenseglob feelworld confNATIONAL econsatcountry polsatisfaction age male if political==1, vce(bootstrap, cluster (countrysample))

regress confIMF  demIMF effIMF fairIMF inflIMF benefitIMF tradeglob developglob feelworld confNATIONAL econsatcountry polsatisfaction age male if political==0, vce(bootstrap, cluster (countrysample))

regress confUNFCCC  demUNFCCC effUNFCCC fairUNFCCC inflUNFCCC benefitUNFCCC envglob feelworld confNATIONAL econsatcountry polsatisfaction age male if political==0, vce(bootstrap, cluster (countrysample))

regress confUNSC  demUNSC effUNSC fairUNSC inflUNSC benefitUNSC defenseglob feelworld confNATIONAL econsatcountry polsatisfaction age male if political==0, vce(bootstrap, cluster (countrysample))
